# Supplementary material for: CD4+CCR6+ T cells dominate the BCG-induced transcriptional signature
Source: PubMed Central journal article supplement — eBioMedicine. 2021 Dec 11;74:103746. doi: 10.1016/j.ebiom.2021.103746 (PMC8671872; doi:10.1016/j.ebiom.2021.103746), 2021-12-11
Supplement: mmc2.pdf [file mmc2.pdf]

## **CD4+CCR6+ T cells dominate the BCG-induced transcriptional signature**

Akul Singhania<sup>1,†</sup>, Paige Dubelko<sup>1,†</sup>, Rebecca Kuan<sup>1</sup>, William D. Chronister<sup>1</sup>, Kaylin Muskat<sup>1</sup>, Jyotirmoy Das<sup>2</sup>, Elizabeth J. Phillips<sup>3,4</sup>, Simon A. Mallal<sup>3,4</sup>, Grégory Seumois<sup>1</sup>, Pandurangan Vijayanand<sup>1</sup>, Alessandro Sette<sup>1,5</sup>, Maria Lerm<sup>2</sup>, Bjoern Peters<sup>1,5</sup>, Cecilia S. Lindestam Arlehamn<sup>1,\*</sup>

<sup>1</sup> Center for Infectious Disease and Vaccine Research, La Jolla Institute for Immunology, La Jolla, CA 92037, USA

<sup>2</sup> Division of Infection and Inflammation, Department of Biomedical and Clinical Sciences, Faculty of Medicine and Health Sciences, Linköping University, Linköping, Sweden

<sup>3</sup> Institute for Immunology and Infectious Diseases, Murdoch University, Perth, WA 6150, Australia

<sup>4</sup> Vanderbilt University School of Medicine, Nashville, TN 37235, USA

<sup>5</sup> Department of Medicine, University of California San Diego, La Jolla, CA 92093, USA

† Co-first authors

\* Corresponding author

Cecilia S. Lindestam Arlehamn

Email: [cecilia@lji.org](mailto:cecilia@lji.org)

Supplementary material  
Supplementary Figures

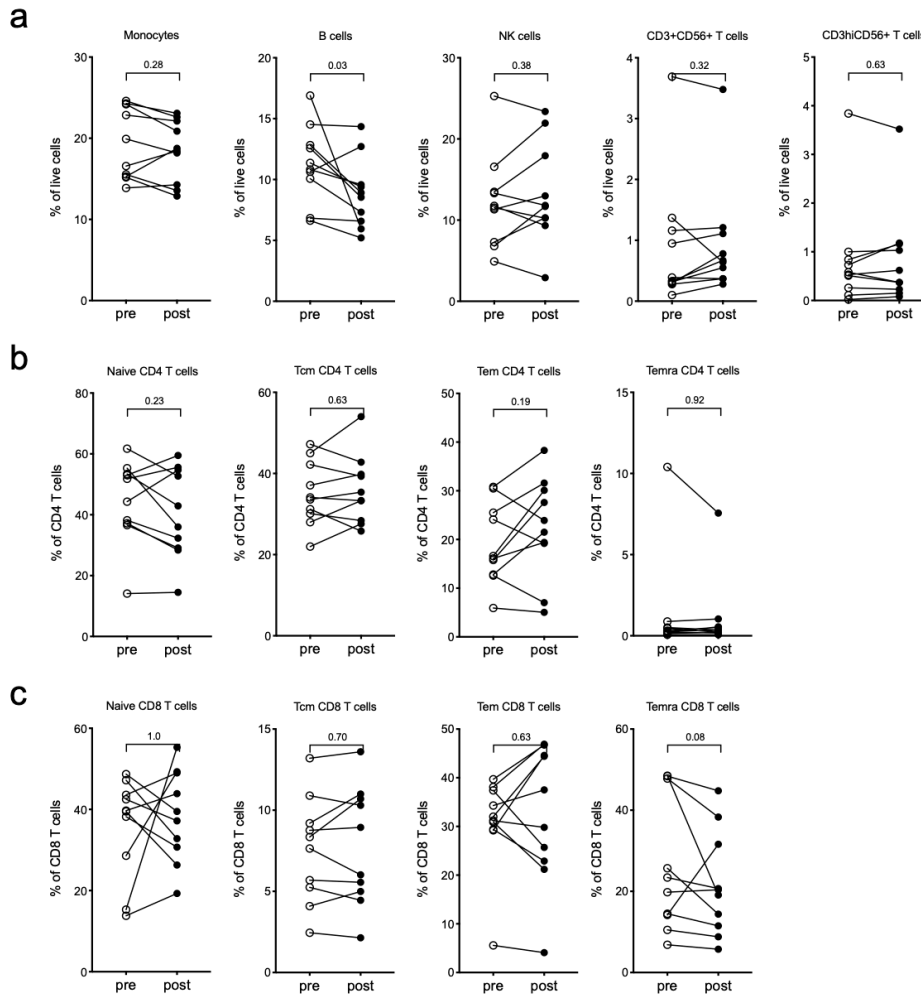

Supplementary Figure 1

**SUPPLEMENTARY FIGURE 1. Cell subset frequencies pre- and post- BCG vaccination. a-c** Frequencies of cell subsets pre- (open circles) and post- (closed circles) BCG vaccination. Each point represents one participant (n=10), Wilcoxon matched pair signed rank test. **a** Major lymphocyte subsets not shown in figure 3. **b, c** Memory T cell subsets defined by CCR7 and CD45RA; Naïve cells (CD45RA+CCR7+), Tcm (CD45RA-CCR7+), Tem (CD45RA-CCR7-), and Temra (CD45RA+CCR7-). **b** CD4 T cell subsets. **c** CD8 T cell subsets.

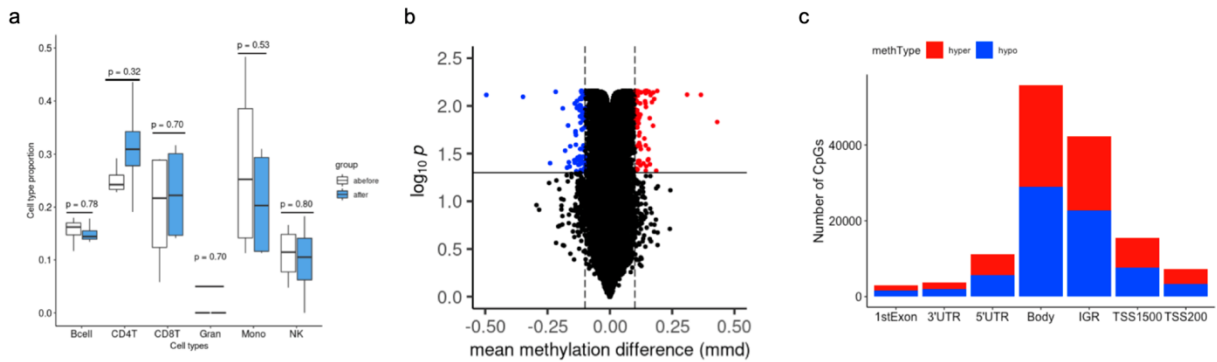

Supplementary Figure 2

**SUPPLEMENTARY FIGURE 2. Characterization of the DNAm alterations.** **a.** Cell type frequency analysis applying the Houseman algorithm to the DNA methylation dataset of samples obtained pre- and post- BCG vaccination. The y-axis shows the frequency of cell types in the group of samples and the x-axis denotes the calculated cell type in the PBMC sample. Student's t-test. **b.** Volcano plot illustrating the hyper- and hypomethylated CpGs. The x-axis represents the mean methylation difference (mmd). The y-axis denotes the significance level (p-value) at the logarithm scale. The solid horizontal line sets the threshold of p-value < 0.05 and the dashed vertical lines used for the cut-off value,  $mmd \geq |0.1|$ . **c.** Number of CpGs present in different chromosomal locations for hypermethylated (red) and hypomethylated (blue) CpGs.

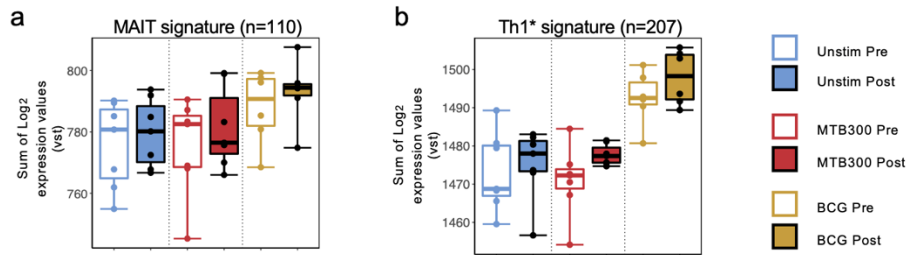

Supplementary Figure 3

**SUPPLEMENTARY FIGURE 3. Cell subset-specific gene signatures pre- and post- BCG vaccination a, b** Boxplots of RNA-sequencing data depicting the sum of log<sub>2</sub> expression values (variance stabilizing transformation, VST) for all genes in the **(a)** MAIT cell signature, and **(b)** Th1\* cell signature. Empty and filled boxplot represent pre- and post-vaccination, respectively, and color represents stimulation condition. Each dot represents an individual donor.

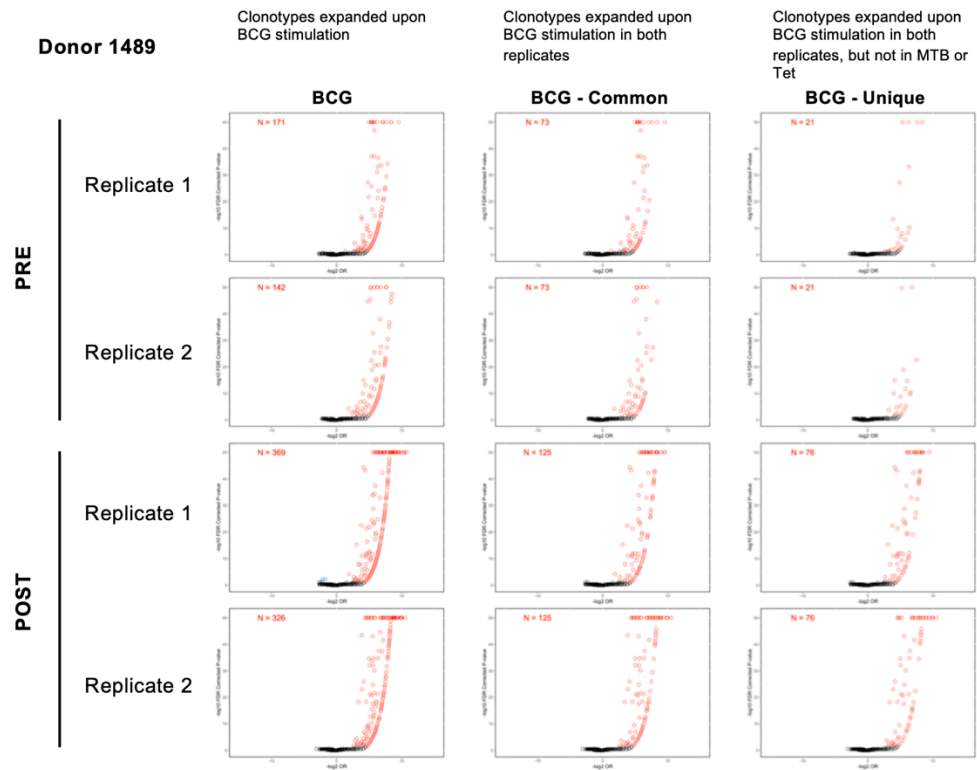

Supplementary Figure 4

**SUPPLEMENTARY FIGURE 4.** Representative volcano plots showing clonotype expansion in response to BCG stimulation. Analysis from Donor 1489 is shown. Column 1 indicates clonotypes expanded upon BCG stimulation in each replicate, pre- and post- vaccination. Column 2 indicates only those clonotypes that expanded upon BCG stimulation in both replicates, pre- and post- vaccination. Column 3 further indicates a subset to show only those clonotypes that expanded upon BCG stimulation in both replicates, but not in MTB300 or Tetanus stimulation, pre- and post- vaccination.

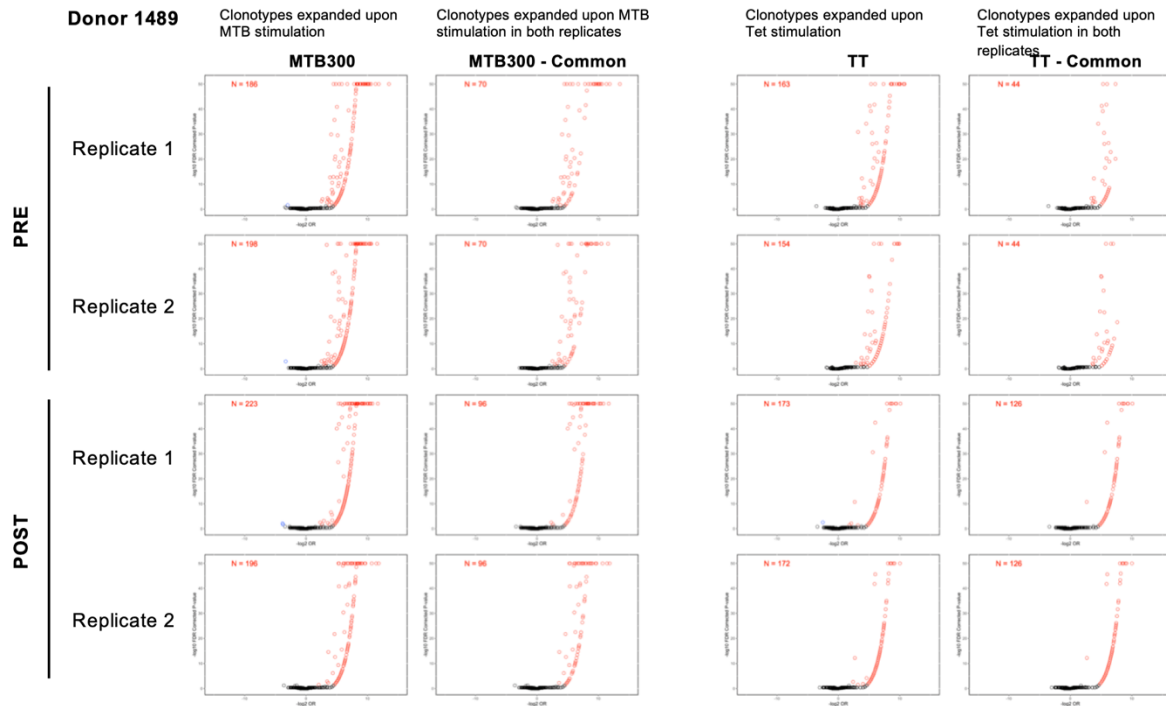

Supplementary Figure 5

**SUPPLEMENTARY FIGURE 5.** Representative volcano plots showing clonotype expansion in response to MTB300 and Tetanus stimulation. Analysis from Donor 1489 is shown. Column 1 indicates clonotypes expanded upon MTB300 stimulation in each replicate, pre- and post-vaccination. Column 2 indicates only those clonotypes that expanded upon MTB300 stimulation in both replicates, pre- and post- vaccination. Column 3 indicates clonotypes expanded upon Tetanus stimulation in each replicate, pre- and post- vaccination. Column 4 indicates only those clonotypes that expanded upon Tetanus stimulation in both replicates, pre- and post- vaccination.

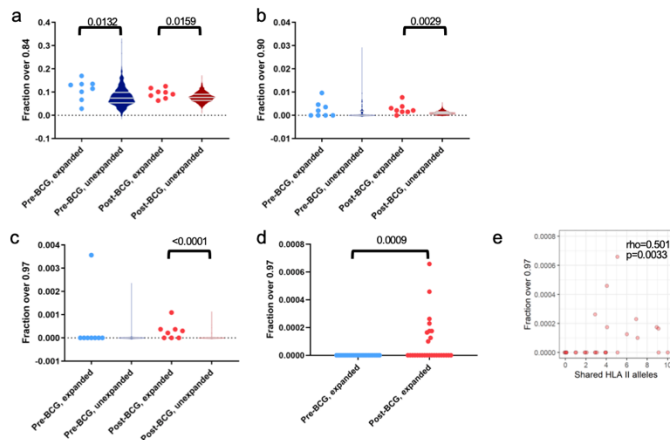

Supplementary Figure 6

**SUPPLEMENTARY FIGURE 6. Comparison of TCRMatch scores within and across T cell repertoires from individuals pre- and post-BCG vaccination.** **a-c** Comparison of CDR3 $\beta$  similarity within individuals before and after BCG vaccination (n=8) and expanded or unexpanded in response to BCG stimulus in vitro, as assessed by the fraction of scores **(a)** >0.84, **(b)** >0.90, **(c)** >0.97. 100 random samplings of each individual's unexpanded TCRs are represented by violin plots. Gray lines indicate first, second and third quartiles. One-tailed Mann-Whitney test. **d** Comparison of CDR3 $\beta$  similarity in expanded T cells across individuals pre- and post-BCG vaccination. One-tailed Mann-Whitney test. **e** Comparison of the fraction of TCRMatch scores >0.97 between two individuals and the number of HLA class II alleles shared by the individuals. One-tailed Spearman test.

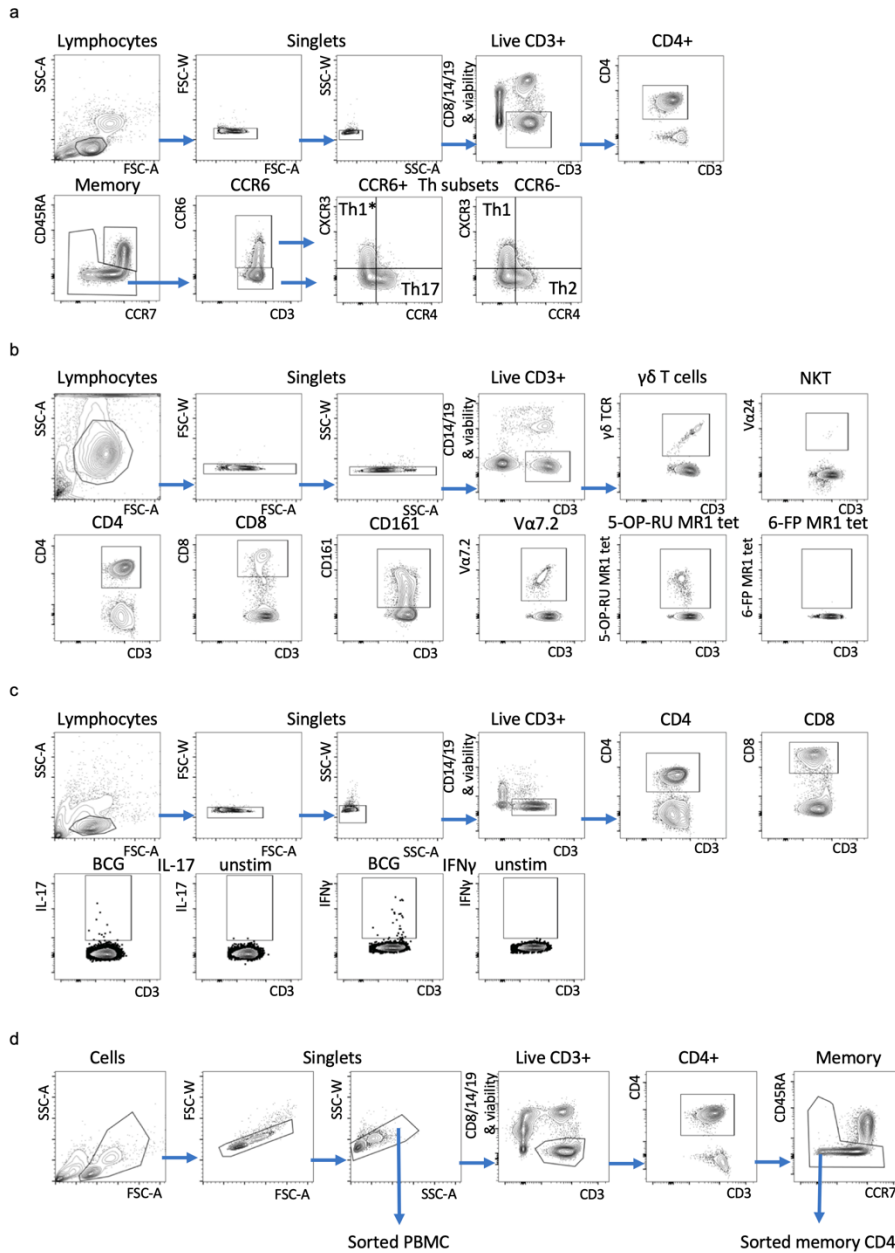

**SUPPLEMENTARY FIGURE 7. Gating strategies for flow cytometry analyses and cell sorting.** **a** Th-subset gating, **b** non-conventional T cells, MAITs were defined as MR1 5-OP-RU tetramer+CD4-V $\alpha$ 24- $\gamma\delta$ TCR-V $\alpha$ 7.2+CD161+. A representative control 6-FP MR1 tetramer stain is shown for comparison. **c** Intracellular cytokine staining. BCG stimulated and unstimulated samples for both IL-17 and IFN $\gamma$  is shown. **d** Cell sorting of PBMC (excluding doublets) and live memory CD4 T cells.



## **Supplementary Tables**

Supplementary table 1-4 provided as excel files

**SUPPLEMENTARY TABLE 1** Differentially expressed genes identified in the different comparisons for PBMC and CD4 memory T cells.

**SUPPLEMENTARY TABLE 2** Pathway enrichment for upregulated genes in PBMCs and CD4 memory T cells.

**SUPPLEMENTARY TABLE 3** MAIT and Th1\* signatures

**SUPPLEMENTARY TABLE 4** TCR repertoire dataset

**SUPPLEMENTARY TABLE 5** Number of clonotypes per subject

|                | Subject | Total Clonotypes |              | Clonotypes expanded upon BCG stimulation |             | Clonotypes expanded in both replicates |                |               |                  |                     |
|----------------|---------|------------------|--------------|------------------------------------------|-------------|----------------------------------------|----------------|---------------|------------------|---------------------|
|                |         | Replicate 1      | Replicate 2  | Replicate 1                              | Replicate 2 | BCG stim                               | BCG stim - tet | BCG stim only | MTB300 stim only | BCG and MTB300 stim |
| <b>PRE</b>     | 1489    | 30544            | 24621        | 171                                      | 142         | 73                                     | 36             | 30            | 33               | 6                   |
|                | 1491    | 18875            | 17343        | 183                                      | 157         | 54                                     | 23             | 18            | 19               | 5                   |
|                | 1492    | 4616             | 5515         | 105                                      | 209         | 22                                     | 20             | 19            | 13               | 1                   |
|                | 1497    | 5597             | 6524         | 174                                      | 184         | 68                                     | 44             | 32            | 35               | 12                  |
|                | 1499    | 9248             | 8944         | 205                                      | 147         | 84                                     | 62             | 46            | 27               | 16                  |
|                | 1500    | 10476            | 12232        | 369                                      | 382         | 90                                     | 55             | 40            | 30               | 15                  |
|                | 1502    | 13174            | 17269        | 235                                      | 289         | 55                                     | 40             | 34            | 34               | 6                   |
| <b>AVERAGE</b> | -       | <i>12558</i>     | <i>13010</i> | <i>191</i>                               | <i>199</i>  | <i>61</i>                              | <i>38</i>      | <i>29</i>     | <i>27</i>        | <i>9</i>            |
| <b>POST</b>    | 1489    | 22744            | 19449        | 369                                      | 326         | 125                                    | 98             | 82            | 49               | 16                  |
|                | 1491    | 17607            | 14725        | 363                                      | 298         | 131                                    | 79             | 59            | 48               | 20                  |
|                | 1492    | 9533             | 12276        | 357                                      | 563         | 109                                    | 92             | 74            | 62               | 18                  |
|                | 1497    | 6756             | 6840         | 299                                      | 277         | 117                                    | 85             | 68            | 85               | 17                  |
|                | 1499    | 5408             | 5296         | 288                                      | 301         | 147                                    | 116            | 97            | 47               | 19                  |
|                | 1500    | 12347            | 10739        | 602                                      | 658         | 170                                    | 145            | 127           | 66               | 18                  |
|                | 1502    | 9916             | 11308        | 590                                      | 520         | 155                                    | 126            | 103           | 79               | 23                  |
| <b>AVERAGE</b> | -       | <i>11419</i>     | <i>10622</i> | <i>387</i>                               | <i>397</i>  | <i>132</i>                             | <i>102</i>     | <i>84</i>     | <i>60</i>        | <i>18</i>           |

**SUPPLEMENTARY TABLE 6** GLIPH analysis within and across donors to identify similarities in clonotypes that expanded pre- and post- vaccination, upon BCG stimulation in both replicates, but not in MTB300 or Tetanus stimulation.

|                                                                    | Subject | Clonotypes expanded in |      |                      | GLIPH analysis |        |                                                                                           |                     |                    |
|--------------------------------------------------------------------|---------|------------------------|------|----------------------|----------------|--------|-------------------------------------------------------------------------------------------|---------------------|--------------------|
|                                                                    |         | Pre                    | Post | Common in Pre & Post | 3-mers         | 4-mers | Convergence groups                                                                        | Global convergences | Local convergences |
| Similarity between Pre and Post within each donor in BCG stim only | 2466    | 9                      | 55   | 6                    | -              | -      | 3 groups with 2 peptides each                                                             | 3                   | -                  |
|                                                                    | 1502    | 20                     | 89   | 14                   | -              | -      | 7 groups with 2 peptides each                                                             | 7                   | -                  |
|                                                                    | 1500    | 27                     | 114  | 13                   | -              | -      | 2 groups with 2 peptides each                                                             | 2                   | -                  |
|                                                                    | 1499    | 12                     | 63   | 34                   | 2              | -      | 1 group with 6 peptides<br>2 groups with 5 peptides each<br>3 groups with 2 peptides each | 23                  | 20                 |
|                                                                    | 1497    | 19                     | 55   | 13                   | 1              | -      | 1 group with 5 peptides<br>4 groups with 2 peptides each                                  | 7                   | 6                  |
|                                                                    | 1492    | 14                     | 69   | 5                    | -              | -      | 1 group with 5 peptides<br>3 groups with 2 peptides each                                  | 4                   | 6                  |
|                                                                    | 1491    | 11                     | 52   | 7                    | -              | -      | -                                                                                         | -                   | -                  |
|                                                                    | 1489    | 13                     | 65   | 17                   | -              | -      | 1 group with 2 peptides                                                                   | 1                   | -                  |

**SUPPLEMENTARY TABLE 7 HLA alleles expressed by each subject**

| Subject | A                    | B                    | C                    | DPB1                       | DQA1                       | DQB1                       | DRB1                       | DRB3/4/5                   |
|---------|----------------------|----------------------|----------------------|----------------------------|----------------------------|----------------------------|----------------------------|----------------------------|
| 1489    | A*01:01 /<br>A*02:01 | B*08:01 /<br>B*15:01 | C*01:02 /<br>C*07:01 | DPB1*02:01 /<br>DPB1*04:01 | DQA1*04:01 /<br>DQA1*05:01 | DQB1*02:01 /<br>DQB1*04:02 | DRB1*03:01 /<br>DRB1*08:01 | DRB3*01:01 /               |
| 1490    | A*02:01 /<br>A*03:01 | B*07:02 /<br>B*44:05 | C*02:02 /<br>C*07:02 | DPB1*03:01 /<br>DPB1*11:01 | DQA1*02:01 /<br>DQA1*03:01 | DQB1*02:02 /<br>DQB1*03:02 | DRB1*04:04 /<br>DRB1*07:01 | DRB4*01:01 /<br>DRB4*01:01 |
| 1491    | A*02:01 /<br>A*68:01 | B*15:01 /<br>B*27:05 | C*02:02 /<br>C*03:03 | DPB1*02:01 /<br>DPB1*04:01 | DQA1*03:01 /<br>DQA1*03:01 | DQB1*03:01 /<br>DQB1*03:02 | DRB1*04:01 /<br>DRB1*04:01 | DRB4*01:01 /<br>DRB4*01:01 |
| 1492    | A*02:01 /<br>A*32:01 | B*15:01 /<br>B*44:02 | C*04:01 /<br>C*05:01 | DPB1*03:01 /<br>DPB1*20:01 | DQA1*03:01 /<br>DQA1*04:01 | DQB1*03:02 /<br>DQB1*04:02 | DRB1*04:01 /<br>DRB1*08:01 | DRB4*01:01 /               |
| 1493    | A*03:01 /<br>A*03:01 | B*35:01 /<br>B*56:01 | C*01:02 /<br>C*04:01 | DPB1*04:01 /<br>DPB1*04:02 | DQA1*01:01 /<br>DQA1*01:02 | DQB1*05:01 /<br>DQB1*06:02 | DRB1*01:01 /<br>DRB1*15:01 | DRB5*01:01 /               |
| 1494    | A*01:01 /<br>A*02:01 | B*15:01 /<br>B*55:01 | C*03:03 /<br>C*03:04 | DPB1*04:01 /<br>DPB1*04:02 | DQA1*03:01 /<br>DQA1*05:01 | DQB1*03:01 /<br>DQB1*03:02 | DRB1*04:01 /<br>DRB1*11:04 | DRB3*02:02 /<br>DRB4*01:01 |
| 1495    | A*25:01 /<br>A*26:01 | B*18:01 /<br>B*51:07 | C*12:03 /<br>C*14:02 | DPB1*04:01 /<br>DPB1*19:01 | DQA1*01:02 /<br>DQA1*01:03 | DQB1*06:03 /<br>DQB1*06:09 | DRB1*13:01 /<br>DRB1*13:02 | DRB3*02:02 /<br>DRB3*03:01 |
| 1496    | A*02:01 /<br>A*33:03 | B*40:23 /<br>B*50:01 | C*03:04 /<br>C*06:02 | DPB1*04:02 /<br>DPB1*14:01 | DQA1*03:01 /<br>DQA1*03:01 | DQB1*03:01 /<br>DQB1*03:02 | DRB1*04:01 /<br>DRB1*09:01 | DRB4*01:01 /<br>DRB4*01:01 |
| 1497    | A*01:01 /<br>A*02:01 | B*44:02 /<br>B*44:02 | C*05:01 /<br>C*05:01 | DPB1*04:01 /<br>DPB1*04:01 | DQA1*01:02 /<br>DQA1*05:01 | DQB1*03:01 /<br>DQB1*06:02 | DRB1*12:01 /<br>DRB1*15:01 | DRB3*02:02 /<br>DRB5*01:01 |
| 1498    | A*03:01 /<br>A*68:01 | B*44:02 /<br>B*57:01 | C*06:02 /<br>C*07:12 | DPB1*01:01 /<br>DPB1*04:01 | DQA1*01:01 /<br>DQA1*02:01 | DQB1*03:03 /<br>DQB1*05:01 | DRB1*01:01 /<br>DRB1*07:01 | DRB4*01:01 /               |
| 1499    | A*01:01 /<br>A*02:01 | B*08:01 /<br>B*15:01 | C*03:04 /<br>C*07:01 | DPB1*04:01 /<br>DPB1*04:01 | DQA1*03:01 /<br>DQA1*05:01 | DQB1*02:01 /<br>DQB1*03:02 | DRB1*03:01 /<br>DRB1*04:01 | DRB3*01:01 /<br>DRB4*01:01 |
| 1500    | A*03:01 /<br>A*03:01 | B*07:02 /<br>B*07:02 | C*07:02 /<br>C*07:02 | DPB1*03:01 /<br>DPB1*03:01 | DQA1*01:01 /<br>DQA1*01:02 | DQB1*05:01 /<br>DQB1*06:02 | DRB1*10:01 /<br>DRB1*15:01 | DRB5*01:01 /               |
| 1501    | A*02:01 /<br>A*02:01 | B*15:01 /<br>B*40:01 | C*03:03 /<br>C*03:04 | DPB1*02:01 /<br>DPB1*03:01 | DQA1*03:01 /<br>DQA1*03:01 | DQB1*03:01 /<br>DQB1*03:02 | DRB1*04:01 /<br>DRB1*04:07 | DRB4*01:01 /<br>DRB4*01:01 |
| 1502    | A*02:01 /<br>A*03:01 | B*08:01 /<br>B*44:02 | C*05:01 /<br>C*07:01 | DPB1*04:01 /<br>DPB1*04:01 | DQA1*01:02 /<br>DQA1*03:01 | DQB1*03:01 /<br>DQB1*06:02 | DRB1*04:01 /<br>DRB1*15:01 | DRB4*01:01 /<br>DRB5*01:01 |
| 1503    | A*02:01 /<br>A*03:01 | B*07:02 /<br>B*15:01 | C*03:03 /<br>C*07:02 | DPB1*02:01 /<br>DPB1*04:01 | DQA1*01:02 /<br>DQA1*03:01 | DQB1*03:02 /<br>DQB1*06:04 | DRB1*04:01 /<br>DRB1*13:02 | DRB3*03:01 /<br>DRB4*01:01 |
| 1504    | A*01:01 /<br>A*02:01 | B*08:01 /<br>B*15:01 | C*03:04 /<br>C*07:01 | DPB1*03:01 /<br>DPB1*04:01 | DQA1*03:01 /<br>DQA1*05:01 | DQB1*02:01 /<br>DQB1*03:02 | DRB1*03:01 /<br>DRB1*04:01 | DRB3*01:01 /<br>DRB4*01:01 |
| 2466    | A*02:01 /<br>A*02:01 | B*40:01 /<br>B*44:02 | C*03:04 /<br>C*05:01 | DPB1*02:01 /<br>DPB1*04:02 | DQA1*02:01 /<br>DQA1*03:01 | DQB1*02:02 /<br>DQB1*03:01 | DRB1*04:01 /<br>DRB1*07:01 | DRB4*01:01 /<br>DRB4*01:01 |
